# Supplementary material for: Regularized regression analysis for the prediction of virus inactivation efficiency by chloramine disinfection
Source: Royal Society of Chemistry journal article supplement (doi:10.1039/d0ew00539h), 2020-01-01
Supplement: d0ew00539h2.xlsx [file d0ew00539h2.xlsx]

## Sheet: Sheet1
Norovirus				Adenovirus				Poliovirus
variable	value	sign		variable	value	sign		variable	value	sign
I	0.0238959	pls		I	0.00498647	pls		I	0.300032	pls
k	0.0336292	mns		k	0.0705356	pls		k	0	pls
t	0.859903	pls		t	0.63568	pls		t	0	pls
C	0.683144	pls		C	0.243422	pls		C	0.344754	pls
p	0.0561548	mns		p	0.43502	minus		p	0.184958	pls
T	0.111354	pls		T	0.180945	pls		T	0.160336	mns
E	0.0263087	mns		E	0	pls
U	0	pls		U	0	pls		Coxsackievirus
W	0.0533947	mns		W	0.0398758	minus		variable	value	sign
I I	0.234118	mns		I k	0.0553483	minus		ini	0.240356	mns
I k	0	pls		I t	0.118553	pls		k	0.0022424	pls
I t	0.235867	mns		I C	0.0691625	pls		t	1.22	pls
I C	0.152261	pls		I p	0.0475965	minus		Ct	0.320563	pls
I pH	0.0317974	mns		I T	0	pls		pH	0	pls
I T	0	pls		I E	0	pls		EC	0	pls
I E	0.0574896	mns		I U	0	pls		TU	0.0990136	pls
I U	0	pls		I W	0.0129332	minus		WQ	0.0257558	mns
I W	0	pls		k t	0.0685667	pls		S	0.346271	pls
k k	0.0248454	mns		k C	0.120119	pls
k t	0.0330026	pls		k p	0.011025	pls		Echovirus
k C	0.0918678	pls		k T	0.0860733	pls		variable	value	sign
k p	0.0619345	mns		k E	0	pls		t	0.648512	pls
k T	0.0845952	pls		k U	0	pls		Ct	0.171344	mns
k E	0.00629692	mns		k W	0.0298825	minus		pH	0.2927	pls
k U	0.0251305	pls		t C	0.0307762	minus		EC	0.0524483	pls
k W	0.051324	mns		t p	0.00423852	pls		TU	0.42	mns
t t	0.113428	mns		t T	0.167044	pls		WQ	0.154107	mns
t C	0.0299966	pls		t E	0.00576006	minus		S	0.487316	pls
t p	0.0617937	pls		t U	0.0126539	pls
t T	0.202183	pls		t W	0.0161731	minus
t E	0.0812505	pls		C p	0.0676831	minus
t U	0.130666	pls		C T	0.0277649	pls
t W	0.0332916	mns		C E	0.0185849	minus
C C	0.139102	pls		C U	0.00343875	minus
C p	0.0413507	mns		C W	0.0443573	minus
C T	0.0768528	pls		p T	0	pls
C E	0.0590095	mns		p E	0	pls
C U	0.043169	mns		p U	0	pls
C W	0	pls		p W	5.26e-08	minus
p p	0.0285068	mns		T E	0	pls
p T	0	pls		T U	0	pls
p E	0.00233082	pls		T W	0	pls
p U	0.00628243	pls		E U	0.0351683	pls
p W	0	pls		E W	0	pls
T T	0	pls		U W	0	pls
T E	0.0326417	mns
T U	0.0190147	mns
T W	0.0138401	mns
E E	0.000200397	pls
E U	0.0101824	pls
E W	0.00742664	pls
U U	0.0469111	pls
U W	0	pls
W W	0	pls
