# Supplementary material for: Regularized regression analysis for the prediction of virus inactivation efficiency by chloramine disinfection
Source: Royal Society of Chemistry journal article supplement (doi:10.1039/d0ew00539h), 2020-01-01
Supplement: d0ew00539h3.xlsx [file d0ew00539h3.xlsx]

## Sheet: Sheet1
virus	LRV	Chloramine	k	t	Ct	pH	Temp	EC	Turbidity	Water	Strain
Norovirus	1.63	15	0.0106522	1	14.9204	7.1	20			environ	MNV
Norovirus	1.71	15	0.0106522	1.5	22.3212	7.1	20			environ	MNV
Norovirus	3.02	15	0.0106522	2.5	37.0051	7.1	20			environ	MNV
Norovirus	3.3	15	0.0106522	4.5	65.9077	7.1	20			environ	MNV
Norovirus	4.68	15	0.0106522	10	142.287	7.1	20			environ	MNV
Norovirus	4.68	15	0.0106522	15	207.945	7.1	20			environ	MNV
Norovirus	4.68	15	0.0106522	30	385.182	7.1	20			environ	MNV
Norovirus	4.69	15	0.0106522	60	665.003	7.1	20			environ	MNV
Norovirus	4.67	15	0.0106522	120	1015.96	7.1	20			environ	MNV
Norovirus	0.45	5	0.0188342	1	4.95321	7.1	20			environ	MNV
Norovirus	2.1	5	0.0188342	2.5	12.2103	7.1	20			environ	MNV
Norovirus	2.66	5	0.0188342	4.5	21.5729	7.1	20			environ	MNV
Norovirus	3.18	5	0.0188342	10	45.5736	7.1	20			environ	MNV
Norovirus	4.67	5	0.0188342	15	65.3368	7.1	20			environ	MNV
Norovirus	4.93	5	0.0188342	30	114.593	7.1	20			environ	MNV
Norovirus	4.93	5	0.0188342	60	179.722	7.1	20			environ	MNV
Norovirus	4.94	5	0.0188342	120	237.775	7.1	20			environ	MNV
Norovirus	0.03	1	0.0734327	1.5	1.42034	7.1	20			environ	MNV
Norovirus	0.31	1	0.0734327	2.5	2.28394	7.1	20			environ	MNV
Norovirus	1.08	1	0.0734327	4.5	3.83205	7.1	20			environ	MNV
Norovirus	1.56	1	0.0734327	10	7.08365	7.1	20			environ	MNV
Norovirus	1.92	1	0.0734327	15	9.09165	7.1	20			environ	MNV
Norovirus	3.28	1	0.0734327	30	12.1135	7.1	20			environ	MNV
Norovirus	5.03	1	0.0734327	60	13.4517	7.1	20			environ	MNV
Norovirus	5	1	0.0734327	120	13.6159	7.1	20			environ	MNV
Norovirus	1.39	0.5	0.0755925	4.5	1.90725	7.1	20			environ	MNV
Norovirus	0.89	0.5	0.0755925	10	3.50844	7.1	20			environ	MNV
Norovirus	1.38	0.5	0.0755925	15	4.48603	7.1	20			environ	MNV
Norovirus	2.25	0.5	0.0755925	30	5.92954	7.1	20			environ	MNV
Norovirus	4.87	0.5	0.0755925	60	6.5435	7.1	20			environ	MNV
Norovirus	4.86	0.5	0.0755925	120	6.61365	7.1	20			environ	MNV
Norovirus	1.45	15	0.0106522	1	14.9204	7.1	20			purified	MNV
Norovirus	1.84	15	0.0106522	1.5	22.3212	7.1	20			purified	MNV
Norovirus	2.48	15	0.0106522	2.5	37.0051	7.1	20			purified	MNV
Norovirus	4.69	15	0.0106522	4.5	65.9077	7.1	20			purified	MNV
Norovirus	4.67	15	0.0106522	10	142.287	7.1	20			purified	MNV
Norovirus	4.68	15	0.0106522	15	207.945	7.1	20			purified	MNV
Norovirus	4.67	15	0.0106522	30	385.182	7.1	20			purified	MNV
Norovirus	4.67	15	0.0106522	60	665.003	7.1	20			purified	MNV
Norovirus	4.69	15	0.0106522	120	1015.96	7.1	20			purified	MNV
Norovirus	0.47	1	0.0734327	1	0.964166	7.1	20			purified	MNV
Norovirus	0.75	1	0.0734327	1.5	1.42034	7.1	20			purified	MNV
Norovirus	1.56	1	0.0734327	2.5	2.28394	7.1	20			purified	MNV
Norovirus	2.34	1	0.0734327	4.5	3.83205	7.1	20			purified	MNV
Norovirus	3.5	1	0.0734327	10	7.08365	7.1	20			purified	MNV
Norovirus	4.61	1	0.0734327	15	9.09165	7.1	20			purified	MNV
Norovirus	4.63	1	0.0734327	30	12.1135	7.1	20			purified	MNV
Norovirus	4.63	1	0.0734327	60	13.4517	7.1	20			purified	MNV
Norovirus	4.62	1	0.0734327	120	13.6159	7.1	20			purified	MNV
Norovirus	0.21	1	0.0734327	1	0.964166	7	5			purified	MNV
Norovirus	3.04	1	0.0734327	60	13.4517	7	5			purified	MNV
Norovirus	3.67	1	0.0734327	120	13.6159	7	5			purified	MNV
Norovirus	4.21	1	0.0734327	180	13.6179	7	5			purified	MNV
Norovirus	4.83	1	0.0734327	270	13.6179	7	5			purified	MNV
Norovirus	4.89	1	0.0734327	300	13.6179	7	5			purified	MNV
Norovirus	1.17	1	0.0734327	15	9.09165	8	5			purified	MNV
Norovirus	1.81	1	0.0734327	30	12.1135	8	5			purified	MNV
Norovirus	2.69	1	0.0734327	60	13.4517	8	5			purified	MNV
Norovirus	3.32	1	0.0734327	90	13.5996	8	5			purified	MNV
Norovirus	3.85	1	0.0734327	150	13.6177	8	5			purified	MNV
Norovirus	3.95	1	0.0734327	180	13.6179	8	5			purified	MNV
Norovirus	4.24	1	0.0734327	210	13.6179	8	5			purified	MNV
Norovirus	0.1	1	0.0734327	0.01	0.00999633	7	5	92	0.55	environ	MNV
Norovirus	2.34	1	0.0734327	30	12.1135	7	5	92	0.55	environ	MNV
Norovirus	3.31	1	0.0734327	60	13.4517	7	5	92	0.55	environ	MNV
Norovirus	3.83	1	0.0734327	120	13.6159	7	5	92	0.55	environ	MNV
Norovirus	4.45	1	0.0734327	180	13.6179	7	5	92	0.55	environ	MNV
Norovirus	4.77	1	0.0734327	240	13.6179	7	5	92	0.55	environ	MNV
Norovirus	0.1	1	0.0734327	0.01	0.00999633	7	5	92	0.55	environ	MNV
Norovirus	2.36	1	0.0734327	30	12.1135	7	5	92	0.55	environ	MNV
Norovirus	3.4	1	0.0734327	60	13.4517	7	5	92	0.55	environ	MNV
Norovirus	4.1	1	0.0734327	120	13.6159	7	5	92	0.55	environ	MNV
Norovirus	4.57	1	0.0734327	180	13.6179	7	5	92	0.55	environ	MNV
Norovirus	4.87	1	0.0734327	240	13.6179	7	5	92	0.55	environ	MNV
Norovirus	1	1	0.0734327	1	0.964166	7	5	370	0.17	environ	MNV
Norovirus	2.58	1	0.0734327	60	13.4517	7	5	370	0.17	environ	MNV
Norovirus	3.52	1	0.0734327	120	13.6159	7	5	370	0.17	environ	MNV
Norovirus	4.31	1	0.0734327	210	13.6179	7	5	370	0.17	environ	MNV
Norovirus	1.3	1	0.0734327	1	0.964166	7	5	370	0.17	environ	MNV
Norovirus	2.83	1	0.0734327	60	13.4517	7	5	370	0.17	environ	MNV
Norovirus	3.57	1	0.0734327	120	13.6159	7	5	370	0.17	environ	MNV
Norovirus	4.31	1	0.0734327	210	13.6179	7	5	370	0.17	environ	MNV
Norovirus	0.39	1	0.0734327	4	3.46607	7	5	500	0.6	environ	MNV
Norovirus	2.88	1	0.0734327	60	13.4517	7	5	500	0.6	environ	MNV
Norovirus	4.11	1	0.0734327	120	13.6159	7	5	500	0.6	environ	MNV
Norovirus	0.39	1	0.0734327	4	3.46607	7	5	500	0.6	environ	MNV
Norovirus	3.09	1	0.0734327	60	13.4517	7	5	500	0.6	environ	MNV
Norovirus	4.28	1	0.0734327	120	13.6159	7	5	500	0.6	environ	MNV
Norovirus	0.27	1	0.0734327	3	2.69254	7	5	0	0	environ	MNV
Norovirus	3	1	0.0734327	60	13.4517	7	5	0	0	environ	MNV
Norovirus	3.67	1	0.0734327	120	13.6159	7	5	0	0	environ	MNV
Norovirus	3.94	1	0.0734327	150	13.6177	7	5	0	0	environ	MNV
Norovirus	4.09	1	0.0734327	180	13.6179	7	5	0	0	environ	MNV
Norovirus	4.57	1	0.0734327	240	13.6179	7	5	0	0	environ	MNV
Norovirus	4.66	1	0.0734327	270	13.6179	7	5	0	0	environ	MNV
Norovirus	4.84	1	0.0734327	300	13.6179	7	5	0	0	environ	MNV
Norovirus	0.36	1	0.0734327	3	2.69254	7	5	0	0	environ	MNV
Norovirus	3.08	1	0.0734327	60	13.4517	7	5	0	0	environ	MNV
Norovirus	3.78	1	0.0734327	120	13.6159	7	5	0	0	environ	MNV
Norovirus	4	1	0.0734327	150	13.6177	7	5	0	0	environ	MNV
Norovirus	4.38	1	0.0734327	180	13.6179	7	5	0	0	environ	MNV
Norovirus	4.71	1	0.0734327	240	13.6179	7	5	0	0	environ	MNV
Norovirus	5.02	1	0.0734327	270	13.6179	7	5	0	0	environ	MNV
Norovirus	4.97	1	0.0734327	300	13.6179	7	5	0	0	environ	MNV
Adenovirus	0.1	5.82	0.0188342	24	112.375	8	20			purified	type2
Adenovirus	0.49	5.82	0.0188342	42	168.914	8	20			purified	type2
Adenovirus	0.71	5.82	0.0188342	51	190.758	8	20			purified	type2
Adenovirus	0.39	10	0.0106522	6	58.1228	6	5			purified	type2
Adenovirus	0.89	10	0.0106522	12	112.647	6	5			purified	type2
Adenovirus	1.68	10	0.0106522	24	211.777	6	5			purified	type2
Adenovirus	2.22	10	0.0106522	36	299.012	6	5			purified	type2
Adenovirus	2.65	10	0.0106522	48	375.78	6	5			purified	type2
Adenovirus	2.84	10	0.0106522	60	443.335	6	5			purified	type2
Adenovirus	3.1	10	0.0106522	72	502.785	6	5			purified	type2
Adenovirus	3.55	10	0.0106522	84	555.101	6	5			purified	type2
Adenovirus	4.28	10	0.0106522	132	708.681	6	5			purified	type2
Adenovirus	0.03	12	0.0106522	6	69.7474	7	5			purified	type2
Adenovirus	1.79	12	0.0106522	60	532.003	7	5			purified	type2
Adenovirus	2.5	12	0.0106522	96	721.367	7	5			purified	type2
Adenovirus	2.96	12	0.0106522	150	898.592	7	5			purified	type2
Adenovirus	3.47	12	0.0106522	204	998.296	7	5			purified	type2
Adenovirus	4.35	12	0.0106522	252	1049.63	7	5			purified	type2
Adenovirus	0.58	9.7	0.0106522	48	364.506	8	5			purified	type2
Adenovirus	1.33	9.7	0.0106522	120	656.987	8	5			purified	type2
Adenovirus	1.63	9.7	0.0106522	180	776.761	8	5			purified	type2
Adenovirus	2.19	9.7	0.0106522	186	785.048	8	5			purified	type2
Adenovirus	2.41	9.7	0.0106522	240	839.971	8	5			purified	type2
Adenovirus	2.64	9.7	0.0106522	312	877.804	8	5			purified	type2
Adenovirus	3.3	9.7	0.0106522	372	893.297	8	5			purified	type2
Adenovirus	3.56	9.7	0.0106522	432	901.474	8	5			purified	type2
Adenovirus	0.25	11.7	0.0106522	66	554.592	9	5			purified	type2
Adenovirus	0.38	11.7	0.0106522	108	750.735	9	5			purified	type2
Adenovirus	0.58	11.7	0.0106522	168	914.903	9	5			purified	type2
Adenovirus	1.32	11.7	0.0106522	312	1058.79	9	5			purified	type2
Adenovirus	2.16	11.7	0.0106522	360	1074.63	9	5			purified	type2
Adenovirus	2.71	11.7	0.0106522	552	1095.3	9	5			purified	type2
Adenovirus	3.19	11.7	0.0106522	720	1097.85	9	5			purified	type2
Adenovirus	3.35	11.7	0.0106522	900	1098.29	9	5			purified	type2
Adenovirus	4.07	11.7	0.0106522	1080	1098.35	9	5			purified	type2
Adenovirus	4.29	11.7	0.0106522	1260	1098.36	9	5			purified	type2
Adenovirus	0.1	11	0.0106522	108	705.819	10	5			purified	type2
Adenovirus	0.29	11	0.0106522	180	880.863	10	5			purified	type2
Adenovirus	0.27	11	0.0106522	324	999.912	10	5			purified	type2
Adenovirus	1.35	11	0.0106522	900	1032.58	10	5			purified	type2
Adenovirus	1.92	11	0.0106522	1080	1032.64	10	5			purified	type2
Adenovirus	2.19	11	0.0106522	1260	1032.65	10	5			purified	type2
Adenovirus	2.5	11	0.0106522	1500	1032.65	10	5			purified	type2
Adenovirus	3.05	11	0.0106522	1800	1032.65	10	5			purified	type2
Adenovirus	3.45	11	0.0106522	1920	1032.65	10	5			purified	type2
Adenovirus	3.96	11	0.0106522	2100	1032.65	10	5			purified	type2
Adenovirus	4.2	11	0.0106522	2160	1032.65	10	5			purified	type2
Adenovirus	4.44	11	0.0106522	2220	1032.65	10	5			purified	type2
Adenovirus	1.1	8.27	0.0106522	6	48.0676	6	15			purified	type2
Adenovirus	1.72	8.27	0.0106522	9.6	75.4676	6	15			purified	type2
Adenovirus	2.03	8.27	0.0106522	15	114.647	6	15			purified	type2
Adenovirus	2.41	8.27	0.0106522	30	212.364	6	15			purified	type2
Adenovirus	2.72	8.27	0.0106522	42	280.041	6	15			purified	type2
Adenovirus	3.09	8.27	0.0106522	54	339.596	6	15			purified	type2
Adenovirus	3.5	8.27	0.0106522	60	366.638	6	15			purified	type2
Adenovirus	4.28	8.27	0.0106522	84	459.069	6	15			purified	type2
Adenovirus	0.83	9.52	0.0106522	9	81.7011	7	15			purified	type2
Adenovirus	1.42	9.52	0.0106522	30	244.462	7	15			purified	type2
Adenovirus	2.3	9.52	0.0106522	48	357.742	7	15			purified	type2
Adenovirus	2.48	9.52	0.0106522	60	422.055	7	15			purified	type2
Adenovirus	3.04	9.52	0.0106522	84	528.456	7	15			purified	type2
Adenovirus	3.23	9.52	0.0106522	90	551.07	7	15			purified	type2
Adenovirus	3.47	9.52	0.0106522	132	674.664	7	15			purified	type2
Adenovirus	3.87	9.52	0.0106522	156	724.079	7	15			purified	type2
Adenovirus	0.18	8.73	0.0106522	4.8	40.8507	8	15			purified	type2
Adenovirus	0.65	8.73	0.0106522	6	50.7412	8	15			purified	type2
Adenovirus	1.09	8.73	0.0106522	80.4	471.509	8	15			purified	type2
Adenovirus	1.82	8.73	0.0106522	120	591.288	8	15			purified	type2
Adenovirus	2.03	8.73	0.0106522	156	663.993	8	15			purified	type2
Adenovirus	2.5	8.73	0.0106522	198	720.103	8	15			purified	type2
Adenovirus	2.77	8.73	0.0106522	250.8	762.883	8	15			purified	type2
Adenovirus	3.21	8.73	0.0106522	312	790.024	8	15			purified	type2
Adenovirus	0.8	10.3	0.0106522	60	456.636	9	15			purified	type2
Adenovirus	0.9	10.3	0.0106522	90	596.221	9	15			purified	type2
Adenovirus	1.68	10.3	0.0106522	150	771.292	9	15			purified	type2
Adenovirus	2.25	10.3	0.0106522	222	876.075	9	15			purified	type2
Adenovirus	2.72	10.3	0.0106522	330	938.18	9	15			purified	type2
Adenovirus	2.96	10.3	0.0106522	396	952.7	9	15			purified	type2
Adenovirus	3.95	10.3	0.0106522	600	965.317	9	15			purified	type2
Adenovirus	0.26	10.3	0.0106522	6	59.8665	10	15			purified	type2
Adenovirus	0.45	10.3	0.0106522	60	456.636	10	15			purified	type2
Adenovirus	0.7	10.3	0.0106522	300	927.351	10	15			purified	type2
Adenovirus	1.99	10.3	0.0106522	420	955.912	10	15			purified	type2
Adenovirus	2.94	10.3	0.0106522	780	966.699	10	15			purified	type2
Adenovirus	3.14	10.3	0.0106522	900	966.871	10	15			purified	type2
Adenovirus	3.5	10.3	0.0106522	960	966.902	10	15			purified	type2
Adenovirus	3.67	10.3	0.0106522	1080	966.928	10	15			purified	type2
Adenovirus	3.92	10.3	0.0106522	1200	966.935	10	15			purified	type2
Adenovirus	4.28	10.3	0.0106522	1260	966.936	10	15			purified	type2
Adenovirus	4.53	10.3	0.0106522	1320	966.937	10	15			purified	type2
Adenovirus	0.56	4.4	0.0188342	1.2	5.22078	6	30			purified	type2
Adenovirus	1.3	4.4	0.0188342	6	24.963	6	30			purified	type2
Adenovirus	2.2	4.4	0.0188342	7.8	31.9181	6	30			purified	type2
Adenovirus	2.81	4.4	0.0188342	12	47.2585	6	30			purified	type2
Adenovirus	3.45	4.4	0.0188342	16.8	63.3671	6	30			purified	type2
Adenovirus	3.79	4.4	0.0188342	16.8	63.3671	6	30			purified	type2
Adenovirus	4.45	4.4	0.0188342	16.8	63.3671	6	30			purified	type2
Adenovirus	0.9	9.81	0.0106522	6	57.0185	7	30			purified	type2
Adenovirus	1.9	9.81	0.0106522	8.4	78.8249	7	30			purified	type2
Adenovirus	3	9.81	0.0106522	13.8	125.898	7	30			purified	type2
Adenovirus	4	9.81	0.0106522	19.8	175.122	7	30			purified	type2
Adenovirus	0.46	9.41	0.0106522	27	220.798	8	30			purified	type2
Adenovirus	0.65	9.41	0.0106522	39	300.305	8	30			purified	type2
Adenovirus	1.13	9.41	0.0106522	67.8	454.349	8	30			purified	type2
Adenovirus	1.99	9.41	0.0106522	120	637.345	8	30			purified	type2
Adenovirus	2.96	9.41	0.0106522	180	753.538	8	30			purified	type2
Adenovirus	3.58	9.41	0.0106522	216	794.896	8	30			purified	type2
Adenovirus	4.2	9.41	0.0106522	252	823.082	8	30			purified	type2
Adenovirus	0.1	3.5	0.0188342	24	67.5796	9	30			purified	type2
Adenovirus	0.4	3.5	0.0188342	36	91.5009	9	30			purified	type2
Adenovirus	0.7	3.5	0.0188342	66	132.219	9	30			purified	type2
Adenovirus	0.85	3.5	0.0188342	102	158.618	9	30			purified	type2
Adenovirus	1.4	3.5	0.0188342	138	172.018	9	30			purified	type2
Adenovirus	2	3.5	0.0188342	168	177.981	9	30			purified	type2
Adenovirus	2.5	3.5	0.0188342	193.2	180.948	9	30			purified	type2
Adenovirus	3.2	3.5	0.0188342	222	182.993	9	30			purified	type2
Adenovirus	0.13	4.5	0.0188342	12	48.3326	10	30			purified	type2
Adenovirus	0.31	4.5	0.0188342	42	130.604	10	30			purified	type2
Adenovirus	0.76	4.5	0.0188342	66	169.996	10	30			purified	type2
Adenovirus	0.98	4.5	0.0188342	132	219.041	10	30			purified	type2
Adenovirus	1.89	4.5	0.0188342	150	224.759	10	30			purified	type2
Adenovirus	2.53	4.5	0.0188342	186	231.735	10	30			purified	type2
Adenovirus	0.26	4.16	0.0188342	6	23.6014	6	10			purified	type2
Adenovirus	0.63	4.16	0.0188342	9	34.4388	6	10			purified	type2
Adenovirus	0.83	4.16	0.0188342	10.8	40.6533	6	10			purified	type2
Adenovirus	0.9	4.16	0.0188342	12	44.6808	6	10			purified	type2
Adenovirus	1.06	4.16	0.0188342	15	54.3602	6	10			purified	type2
Adenovirus	1.21	4.16	0.0188342	15.96	57.3439	6	10			purified	type2
Adenovirus	1.31	4.16	0.0188342	17.76	62.7949	6	10			purified	type2
Adenovirus	1.39	4.16	0.0188342	20.4	70.4628	6	10			purified	type2
Adenovirus	1.66	4.16	0.0188342	23.4	78.7258	6	10			purified	type2
Adenovirus	1.89	4.16	0.0188342	25.2	83.4641	6	10			purified	type2
Adenovirus	0.21	5.87	0.0188342	48	185.464	8	10			purified	type2
Adenovirus	1.18	5.87	0.0188342	192	303.288	8	10			purified	type2
Adenovirus	1.24	5.87	0.0188342	204	304.983	8	10			purified	type2
Adenovirus	1.56	5.87	0.0188342	252	308.961	8	10			purified	type2
Adenovirus	2.11	5.87	0.0188342	372	311.385	8	10			purified	type2
Adenovirus	2.29	5.87	0.0188342	372	311.385	8	10			purified	type2
Adenovirus	2.59	5.87	0.0188342	468	311.621	8	10			purified	type2
Adenovirus	0	8.57	0.0106522	180	686.272	10	10			purified	type2
Adenovirus	0	8.57	0.0106522	216	723.939	10	10			purified	type2
Adenovirus	0.02	8.57	0.0106522	342	783.473	10	10			purified	type2
Adenovirus	0.26	8.57	0.0106522	390	791.902	10	10			purified	type2
Adenovirus	1.03	8.57	0.0106522	492	800.269	10	10			purified	type2
Adenovirus	0.81	8.57	0.0106522	558	802.42	10	10			purified	type2
Adenovirus	0.95	8.57	0.0106522	570	802.673	10	10			purified	type2
Adenovirus	1.45	8.57	0.0106522	630	803.55	10	10			purified	type2
Adenovirus	1.34	8.57	0.0106522	660	803.818	10	10			purified	type2
Adenovirus	1.57	8.57	0.0106522	720	804.154	10	10			purified	type2
Adenovirus	1.98	8.57	0.0106522	798	804.366	10	10			purified	type2
Adenovirus	1.86	8.57	0.0106522	822	804.403	10	10			purified	type2
Adenovirus	2.87	8.57	0.0106522	1020	804.514	10	10			purified	type2
Adenovirus	2.77	8.57	0.0106522	1044	804.518	10	10			purified	type2
Adenovirus	3.64	8.57	0.0106522	1248	804.528	10	10			purified	type2
Adenovirus	3.77	8.57	0.0106522	1260	804.528	10	10			purified	type2
Adenovirus	0.03	6.45	0.0188342	12	69.2767	8	20			purified	type2
Adenovirus	0.16	6.45	0.0188342	15	84.2844	8	20			purified	type2
Adenovirus	0.24	6.45	0.0188342	18	98.4677	8	20			purified	type2
Adenovirus	0.39	6.45	0.0188342	24	124.539	8	20			purified	type2
Adenovirus	0.48	6.45	0.0188342	30	147.825	8	20			purified	type2
Adenovirus	0.57	6.45	0.0188342	42	187.199	8	20			purified	type2
Adenovirus	1.1	6.45	0.0188342	49.2	206.888	8	20			purified	type2
Adenovirus	0.72	6.45	0.0188342	52.8	215.776	8	20			purified	type2
Adenovirus	0.83	6.45	0.0188342	60	231.841	8	20			purified	type2
Adenovirus	1.05	6.45	0.0188342	54	218.607	8	20			purified	type2
Adenovirus	1.36	6.45	0.0188342	76.2	260.93	8	20			purified	type2
Adenovirus	1.28	6.45	0.0188342	84	272.07	8	20			purified	type2
Adenovirus	1.51	6.45	0.0188342	66	243.662	8	20			purified	type2
Adenovirus	1.65	6.45	0.0188342	76.2	260.93	8	20			purified	type2
Adenovirus	1.81	6.45	0.0188342	96.6	286.94	8	20			purified	type2
Adenovirus	1.82	6.45	0.0188342	100.2	290.58	8	20			purified	type2
Adenovirus	2.15	6.45	0.0188342	126	310.548	8	20			purified	type2
Adenovirus	2.52	6.45	0.0188342	151.2	322.608	8	20			purified	type2
Adenovirus	3.27	6.45	0.0188342	165.6	327.324	8	20			purified	type2
Adenovirus	0.18	10.7	0.0106522	48	402.084	10	20			purified	type2
Adenovirus	0.17	10.7	0.0106522	96	643.219	10	20			purified	type2
Adenovirus	0.23	10.7	0.0106522	102	665.587	10	20			purified	type2
Adenovirus	0.7	10.7	0.0106522	150	801.245	10	20			purified	type2
Adenovirus	0.57	10.7	0.0106522	192	874.556	10	20			purified	type2
Adenovirus	1.23	10.7	0.0106522	210	897.226	10	20			purified	type2
Adenovirus	2.02	10.7	0.0106522	252	935.917	10	20			purified	type2
Adenovirus	1.52	10.7	0.0106522	288	957.758	10	20			purified	type2
Adenovirus	2.28	10.7	0.0106522	306	965.911	10	20			purified	type2
Adenovirus	3.03	10.7	0.0106522	360	982.785	10	20			purified	type2
Adenovirus	3.33	10.7	0.0106522	378	986.572	10	20			purified	type2
Adenovirus	3.36	10.7	0.0106522	390	988.722	10	20			purified	type2
Adenovirus	0.13	4.75	0.0188342	10.2	44.0804	8	30			purified	type2
Adenovirus	0.6	4.75	0.0188342	21.6	84.2944	8	30			purified	type2
Adenovirus	0.66	4.75	0.0188342	22.8	88.0467	8	30			purified	type2
Adenovirus	1.5	4.75	0.0188342	37.8	128.447	8	30			purified	type2
Adenovirus	1.8	4.75	0.0188342	43.8	141.671	8	30			purified	type2
Adenovirus	2.4	4.75	0.0188342	61.2	172.556	8	30			purified	type2
Adenovirus	2.33	4.75	0.0188342	64.2	176.932	8	30			purified	type2
Adenovirus	3.1	4.75	0.0188342	80.4	196.725	8	30			purified	type2
Adenovirus	2.8	4.75	0.0188342	82.8	199.176	8	30			purified	type2
Adenovirus	2.57	4.75	0.0188342	86.4	202.652	8	30			purified	type2
Adenovirus	3.25	4.75	0.0188342	103.2	216.092	8	30			purified	type2
Adenovirus	3.1	4.75	0.0188342	109.8	220.313	8	30			purified	type2
Adenovirus	3.89	4.75	0.0188342	123	227.332	8	30			purified	type2
Adenovirus	3.45	4.75	0.0188342	125.4	228.431	8	30			purified	type2
Adenovirus	0.12	4.26	0.0188342	46.8	132.502	10	30			purified	type2
Adenovirus	0.44	4.26	0.0188342	87	182.247	10	30			purified	type2
Adenovirus	0.47	4.26	0.0188342	94.8	188.25	10	30			purified	type2
Adenovirus	1.11	4.26	0.0188342	132	207.358	10	30			purified	type2
Adenovirus	1.8	4.26	0.0188342	186	219.376	10	30			purified	type2
Adenovirus	2.38	4.26	0.0188342	192	220.103	10	30			purified	type2
Adenovirus	2.96	4.26	0.0188342	210	221.852	10	30			purified	type2
Adenovirus	0.61	2.5	0.0734327	1	2.41042	8.5	10			purified	type5
Adenovirus	0.86	2.5	0.0734327	1.6	3.77395	8.5	10			purified	type5
Adenovirus	1	2.5	0.0734327	2.7	6.12296	8.5	10			purified	type5
Adenovirus	0.86	2.5	0.0734327	4.5	9.58012	8.5	10			purified	type5
Adenovirus	1.1	2.5	0.0734327	6.2	12.4512	8.5	10			purified	type5
Adenovirus	1.01	2.5	0.0734327	8.2	15.4007	8.5	10			purified	type5
Adenovirus	0.92	2.5	0.0734327	11.3	19.1965	8.5	10			purified	type5
Adenovirus	1.18	2.5	0.0734327	14.1	21.956	8.5	10			purified	type5
Adenovirus	1.61	2.5	0.0734327	23.1	27.8023	8.5	10			purified	type5
Adenovirus	1.08	2.5	0.0734327	38	31.9546	8.5	10			purified	type5
Adenovirus	1.87	2.5	0.0734327	47	32.9655	8.5	10			purified	type5
Adenovirus	1.79	2.5	0.0734327	70	33.8454	8.5	10			purified	type5
Adenovirus	1.92	2.5	0.0734327	75	33.9067	8.5	10			purified	type5
Adenovirus	1.95	2.5	0.0734327	92	34.0052	8.5	10			purified	type5
Adenovirus	1.92	2.5	0.0734327	110	34.0342	8.5	10			purified	type5
Adenovirus	0.85	2.5	0.0734327	34	31.241	8.5	10			purified	type5
Adenovirus	0.44	2.5	0.0734327	38	31.9546	8.5	10			purified	type5
Adenovirus	1.33	2.5	0.0734327	66	33.7773	8.5	10			purified	type5
Adenovirus	0.77	2.5	0.0734327	75	33.9067	8.5	10			purified	type5
Adenovirus	1.52	2.5	0.0734327	81	33.9559	8.5	10			purified	type5
Adenovirus	1.63	2.5	0.0734327	99	34.0211	8.5	10			purified	type5
Adenovirus	1.71	2.5	0.0734327	113	34.0363	8.5	10			purified	type5
Adenovirus	1.74	2.5	0.0734327	133	34.0428	8.5	10			purified	type5
Adenovirus	0.52	1	0.0734327	12	7.97617	7	5			purified	type40
Adenovirus	1.8	1	0.0734327	60	13.4517	7	5			purified	type40
Adenovirus	1.99	1	0.0734327	90	13.5996	7	5			purified	type40
Adenovirus	2.31	1	0.0734327	120	13.6159	7	5			purified	type40
Adenovirus	2.51	1	0.0734327	240	13.6179	7	5			purified	type40
Adenovirus	2.79	1	0.0734327	360	13.6179	7	5			purified	type40
Adenovirus	0.67	1	0.0734327	60	13.4517	8	5			purified	type40
Adenovirus	0.63	1	0.0734327	120	13.6159	8	5			purified	type40
Adenovirus	1.31	1	0.0734327	180	13.6179	8	5			purified	type40
Adenovirus	2.03	1	0.0734327	360	13.6179	8	5			purified	type40
Adenovirus	2.24	1	0.0734327	480	13.6179	8	5			purified	type40
Adenovirus	2.41	1	0.0734327	600	13.6179	8	5			purified	type40
Adenovirus	0.87	1	0.0734327	120	13.6159	7	5			purified	type2
Adenovirus	1.6	1	0.0734327	360	13.6179	7	5			purified	type2
Adenovirus	2.03	1	0.0734327	650	13.6179	7	5			purified	type2
Adenovirus	3.63	1	0.0734327	1350	13.6179	7	5			purified	type2
Adenovirus	4.28	1	0.0734327	1700	13.6179	7	5			purified	type2
Adenovirus	0.37	1	0.0734327	120	13.6159	7	5			purified	type2
Adenovirus	1.19	1	0.0734327	420	13.6179	7	5			purified	type2
Adenovirus	2.63	1	0.0734327	1350	13.6179	7	5			purified	type2
Adenovirus	3.38	1	0.0734327	1700	13.6179	7	5			purified	type2
Adenovirus	4.06	1	0.0734327	2200	13.6179	7	5			purified	type2
Adenovirus	0.1	5	0.0188342	5	23.859	6	25			purified	type3
Adenovirus	2	5	0.0188342	10	45.5736	6	25			purified	type3
Adenovirus	2.03	5	0.0188342	20	83.3237	6	25			purified	type3
Adenovirus	1.5	5	0.0188342	40	140.495	6	25			purified	type3
Adenovirus	1.77	5	0.0188342	60	179.722	6	25			purified	type3
Adenovirus	2.27	5	0.0188342	80	206.637	6	25			purified	type3
Adenovirus	1.28	10	0.0106522	2	19.7885	6	25			purified	type3
Adenovirus	1.27	10	0.0106522	3	29.5257	6	25			purified	type3
Adenovirus	2.21	10	0.0106522	6	58.1228	6	25			purified	type3
Adenovirus	1.47	10	0.0106522	10	94.8581	6	25			purified	type3
Adenovirus	1.74	10	0.0106522	15	138.63	6	25			purified	type3
Adenovirus	1.73	10	0.0106522	30	256.788	6	25			purified	type3
Adenovirus	1.99	10	0.0106522	60	443.335	6	25			purified	type3
Adenovirus	1.98	10	0.0106522	90	578.856	6	25			purified	type3
Adenovirus	1.78	20	0.0106522	3	59.0514	6	25			purified	type3
Adenovirus	2.26	20	0.0106522	5	97.3836	6	25			purified	type3
Adenovirus	2.31	20	0.0106522	10	189.716	6	25			purified	type3
Adenovirus	1.76	20	0.0106522	15	277.26	6	25			purified	type3
Adenovirus	1.53	20	0.0106522	60	886.671	6	25			purified	type3
Adenovirus	2.24	20	0.0106522	90	1157.71	6	25			purified	type3
Adenovirus	1.03	40	0.0106522	0.5	19.9468	6	25			purified	type3
Adenovirus	1.74	40	0.0106522	0.8	31.864	6	25			purified	type3
Adenovirus	1.52	40	0.0106522	1.6	63.4577	6	25			purified	type3
Adenovirus	1.27	40	0.0106522	4	156.639	6	25			purified	type3
Adenovirus	1.52	40	0.0106522	6	232.491	6	25			purified	type3
Adenovirus	2.77	40	0.0106522	30	1027.15	6	25			purified	type3
Adenovirus	3.04	40	0.0106522	45	1429.99	6	25			purified	type3
Adenovirus	4	40	0.0106522	60	1773.34	6	25			purified	type3
Adenovirus	1.24	10	0.0106522	5	48.6918	7	25			purified	type3
Adenovirus	2.24	10	0.0106522	7	67.4539	7	25			purified	type3
Adenovirus	1.5	10	0.0106522	10	94.8581	7	25			purified	type3
Adenovirus	1.75	10	0.0106522	15	138.63	7	25			purified	type3
Adenovirus	1.76	10	0.0106522	30	256.788	7	25			purified	type3
Adenovirus	1.97	10	0.0106522	60	443.335	7	25			purified	type3
Adenovirus	2.04	10	0.0106522	90	578.856	7	25			purified	type3
Adenovirus	0.5	10	0.0106522	15	138.63	7.8	25			purified	type3
Adenovirus	0.52	10	0.0106522	24	211.777	7.8	25			purified	type3
Adenovirus	1.47	10	0.0106522	60	443.335	7.8	25			purified	type3
Adenovirus	1.71	10	0.0106522	90	578.856	7.8	25			purified	type3
Adenovirus	2	10	0.0106522	120	677.306	7.8	25			purified	type3
Adenovirus	2.19	10	0.0106522	180	800.784	7.8	25			purified	type3
Adenovirus	0.51	10	0.0106522	0.5	4.98671	10	25			purified	type3
Adenovirus	2.22	10	0.0106522	2	19.7885	10	25			purified	type3
Adenovirus	3.49	10	0.0106522	3	29.5257	10	25			purified	type3
Adenovirus	3.72	10	0.0106522	6	58.1228	10	25			purified	type3
Adenovirus	3.73	10	0.0106522	10	94.8581	10	25			purified	type3
Adenovirus	0.75	10	0.0106522	15	138.63	6	5			purified	type3
Adenovirus	1.24	10	0.0106522	30	256.788	6	5			purified	type3
Adenovirus	1.47	10	0.0106522	60	443.335	6	5			purified	type3
Adenovirus	1.72	10	0.0106522	90	578.856	6	5			purified	type3
Adenovirus	2.23	10	0.0106522	120	677.306	6	5			purified	type3
Adenovirus	0.5	10	0.0106522	6	58.1228	6	10			purified	type3
Adenovirus	1.99	10	0.0106522	20	180.131	6	10			purified	type3
Adenovirus	2	10	0.0106522	30	256.788	6	10			purified	type3
Adenovirus	2.24	10	0.0106522	50	387.647	6	10			purified	type3
Adenovirus	2.22	10	0.0106522	110	647.916	6	10			purified	type3
Adenovirus	0.77	10	0.0106522	5	48.6918	6	15			purified	type3
Adenovirus	1.49	10	0.0106522	10	94.8581	6	15			purified	type3
Adenovirus	1.51	10	0.0106522	30	256.788	6	15			purified	type3
Adenovirus	0.98	10	0.0106522	65	469.033	6	15			purified	type3
Adenovirus	1.25	10	0.0106522	95	597.524	6	15			purified	type3
Adenovirus	0.5	10	0.0106522	1.5	14.8808	6	30			purified	type3
Adenovirus	1.53	10	0.0106522	2	19.7885	6	30			purified	type3
Adenovirus	2	10	0.0106522	4	39.1598	6	30			purified	type3
Adenovirus	1.52	10	0.0106522	6	58.1228	6	30			purified	type3
Adenovirus	2	10	0.0106522	10	94.8581	6	30			purified	type3
Adenovirus	1.52	10	0.0106522	20	180.131	6	30			purified	type3
Adenovirus	1.25	10	0.0106522	40	325.699	6	30			purified	type3
Adenovirus	1.72	10	0.0106522	60	443.335	6	30			purified	type3
Adenovirus	2	10	0.0106522	90	578.856	6	30			purified	type3
Adenovirus	0.85	1	0.0734327	180	13.6179	7	5	92	0.55	environ	type2
Adenovirus	1.51	1	0.0734327	600	13.6179	7	5	92	0.55	environ	type2
Adenovirus	2.59	1	0.0734327	1200	13.6179	7	5	92	0.55	environ	type2
Adenovirus	3.43	1	0.0734327	1600	13.6179	7	5	92	0.55	environ	type2
Adenovirus	0.75	1	0.0734327	180	13.6179	7	5	92	0.55	environ	type2
Adenovirus	1.88	1	0.0734327	600	13.6179	7	5	92	0.55	environ	type2
Adenovirus	2.85	1	0.0734327	1200	13.6179	7	5	92	0.55	environ	type2
Adenovirus	3.67	1	0.0734327	1600	13.6179	7	5	92	0.55	environ	type2
Adenovirus	1.24	1	0.0734327	280	13.6179	7	5	370	0.17	environ	type2
Adenovirus	2.42	1	0.0734327	1200	13.6179	7	5	370	0.17	environ	type2
Adenovirus	3.14	1	0.0734327	1700	13.6179	7	5	370	0.17	environ	type2
Adenovirus	4.03	1	0.0734327	2200	13.6179	7	5	370	0.17	environ	type2
Adenovirus	4.51	1	0.0734327	2700	13.6179	7	5	370	0.17	environ	type2
Adenovirus	4.75	1	0.0734327	2900	13.6179	7	5	370	0.17	environ	type2
Adenovirus	1.48	1	0.0734327	280	13.6179	7	5	370	0.17	environ	type2
Adenovirus	3.57	1	0.0734327	1700	13.6179	7	5	370	0.17	environ	type2
Adenovirus	4.26	1	0.0734327	2200	13.6179	7	5	370	0.17	environ	type2
Adenovirus	4.98	1	0.0734327	2700	13.6179	7	5	370	0.17	environ	type2
Adenovirus	5.1	1	0.0734327	2900	13.6179	7	5	370	0.17	environ	type2
Adenovirus	1.19	1	0.0734327	400	13.6179	7	5	500	0.6	environ	type2
Adenovirus	3.09	1	0.0734327	1300	13.6179	7	5	500	0.6	environ	type2
Adenovirus	5.01	1	0.0734327	2200	13.6179	7	5	500	0.6	environ	type2
Adenovirus	1.36	1	0.0734327	400	13.6179	7	5	500	0.6	environ	type2
Adenovirus	3.16	1	0.0734327	1300	13.6179	7	5	500	0.6	environ	type2
Adenovirus	5.01	1	0.0734327	2200	13.6179	7	5	500	0.6	environ	type2
Adenovirus	0.78	1	0.0734327	180	13.6179	7	5	0	0	environ	type2
Adenovirus	2.23	1	0.0734327	650	13.6179	7	5	0	0	environ	type2
Adenovirus	4.28	1	0.0734327	1700	13.6179	7	5	0	0	environ	type2
Adenovirus	1.03	1	0.0734327	180	13.6179	7	5	0	0	environ	type2
Adenovirus	1.88	1	0.0734327	650	13.6179	7	5	0	0	environ	type2
Adenovirus	4.23	1	0.0734327	1700	13.6179	7	5	0	0	environ	type2
Poliovirus	0.48	100	0.0106522	0.00166667	0.166665	5.2	37				type3, Saukett
Poliovirus	0.98	100	0.0106522	0.005	0.499987	5.2	37				type3, Saukett
Poliovirus	4.02	100	0.0106522	0.00833333	0.833296	5.2	37				type3, Saukett
Poliovirus	0.38	10	0.0106522	0.0666667	0.66643	5.2	37				type3, Saukett
Poliovirus	0.52	10	0.0106522	0.4	3.99149	5.2	37				type3, Saukett
Poliovirus	0.52	10	0.0106522	0.8	7.96601	5.2	37				type3, Saukett
Poliovirus	1.53	1000	0.0106522	0.00333333	3.33327	8.4	37				type3, Saukett
Poliovirus	2.75	1000	0.0106522	0.00666667	6.66643	8.4	37				type3, Saukett
Poliovirus	4.34	1000	0.0106522	0.0166667	16.6652	8.4	37				type3, Saukett
Poliovirus	4.94	1000	0.0106522	0.0333333	33.3274	8.4	37				type3, Saukett
Poliovirus	0.26	100	0.0106522	0.01	0.999947	8.4	37				type3, Saukett
Poliovirus	0.64	100	0.0106522	0.0333333	3.33274	8.4	37				type3, Saukett
Poliovirus	1.74	100	0.0106522	0.0666667	6.6643	8.4	37				type3, Saukett
Poliovirus	4.95	100	0.0106522	0.4	39.9149	8.4	37				type3, Saukett
Poliovirus	0.35	10	0.0106522	0.0666667	0.66643	8.4	37				type3, Saukett
Poliovirus	0.9	10	0.0106522	0.4	3.99149	8.4	37				type3, Saukett
Poliovirus	1.69	10	0.0106522	0.8	7.96601	8.4	37				type3, Saukett
Poliovirus	0.62	10	0.0106522	15	138.63	6	5				type2
Poliovirus	0.63	10	0.0106522	30	256.788	6	5				type2
Poliovirus	1.02	10	0.0106522	45	357.498	6	5				type2
Poliovirus	1.2	10	0.0106522	60	443.335	6	5				type2
Poliovirus	1.61	10	0.0106522	80	538.4	6	5				type2
Poliovirus	0.82	20	0.0106522	15	277.26	6	5				type2
Poliovirus	1.81	20	0.0106522	30	513.576	6	5				type2
Poliovirus	2.03	20	0.0106522	45	714.995	6	5				type2
Poliovirus	2.8	20	0.0106522	60	886.671	6	5				type2
Poliovirus	0.6	40	0.0106522	5	194.767	6	5				type2
Poliovirus	1.42	40	0.0106522	10	379.432	6	5				type2
Poliovirus	1.81	40	0.0106522	20	720.525	6	5				type2
Poliovirus	2.41	40	0.0106522	42	1354.49	6	5				type2
Poliovirus	0.63	60	0.0106522	3	177.154	6	5				type2
Poliovirus	1.03	60	0.0106522	6	348.737	6	5				type2
Poliovirus	1.62	60	0.0106522	9	514.923	6	5				type2
Poliovirus	1.62	60	0.0106522	12	675.882	6	5				type2
Poliovirus	2.6	60	0.0106522	30	1540.73	6	5				type2
Poliovirus	2.81	60	0.0106522	45	2144.99	6	5				type2
Poliovirus	1.3	0.5	0.0755925	1.5	0.709042	6	5				type2
Poliovirus	1.75	0.5	0.0755925	2.5	1.13899	6	5				type2
Poliovirus	2.04	0.5	0.0755925	3.5	1.53763	6	5				type2
Poliovirus	3.23	0.5	0.0755925	6	2.41184	6	5				type2
Poliovirus	4.33	0.5	0.0755925	12	3.94424	6	5				type2
Poliovirus	0.98	0.5	0.0755925	1.5	0.709042	7.8	5				type2
Poliovirus	1.99	0.5	0.0755925	2.5	1.13899	7.8	5				type2
Poliovirus	2.2	0.5	0.0755925	3.5	1.53763	7.8	5				type2
Poliovirus	3.57	0.5	0.0755925	6	2.41184	7.8	5				type2
Poliovirus	3.96	0.5	0.0755925	12	3.94424	7.8	5				type2
Poliovirus	1.44	0.5	0.0755925	1.5	0.709042	10	5				type2
Poliovirus	1.96	0.5	0.0755925	2.5	1.13899	10	5				type2
Poliovirus	3.04	0.5	0.0755925	4	1.72593	10	5				type2
Poliovirus	3.96	0.5	0.0755925	9	3.26455	10	5				type2
Poliovirus	4.98	0.5	0.0755925	14	4.3189	10	5				type2
Poliovirus	0.5	1000	0.0106522	1	994.693	7	37				type3, Saukett
Poliovirus	2	1000	0.0106522	10	9485.81	7	37				type3, Saukett
Poliovirus	4	1000	0.0106522	30	25678.8	7	37				type3, Saukett
Poliovirus	4	1000	0.0106522	60	44333.5	7	37				type3, Saukett
Poliovirus	5.5	1000	0.0106522	1440	93877.4	7	37				type3, Saukett
Poliovirus	0.1	100	0.0106522	1	99.4693	7	37				type3, Saukett
Poliovirus	0.3	100	0.0106522	10	948.581	7	37				type3, Saukett
Poliovirus	0.7	100	0.0106522	30	2567.88	7	37				type3, Saukett
Poliovirus	0.7	100	0.0106522	60	4433.35	7	37				type3, Saukett
Poliovirus	1	100	0.0106522	1440	9387.74	7	37				type3, Saukett
Poliovirus	0.1	10	0.0106522	1	9.94693	7	37				type3, Saukett
Poliovirus	0.3	10	0.0106522	60	443.335	7	37				type3, Saukett
Poliovirus	0.7	10	0.0106522	1440	938.774	7	37				type3, Saukett
Poliovirus	0.4	1000	0.0106522	1	994.693	7	37				type3, Saukett
Poliovirus	2.1	1000	0.0106522	10	9485.81	7	37				type3, Saukett
Poliovirus	3.3	1000	0.0106522	30	25678.8	7	37				type3, Saukett
Poliovirus	5.5	1000	0.0106522	60	44333.5	7	37				type3, Saukett
Poliovirus	0.9	100	0.0106522	10	948.581	7	37				type3, Saukett
Poliovirus	1.2	100	0.0106522	30	2567.88	7	37				type3, Saukett
Poliovirus	5.5	100	0.0106522	1440	9387.74	7	37				type3, Saukett
Poliovirus	0.8	1	7.1	2880	0.140845	7	37				type3, Saukett
Poliovirus	0.7	1	7.1	5760	0.140845	7	37				type3, Saukett
Poliovirus	1.6	1	7.1	10080	0.140845	7	37				type3, Saukett
Poliovirus	1.2	10	0.0106522	1440	938.774	7	37				type3, Saukett
Poliovirus	2.8	10	0.0106522	2880	938.774	7	37				type3, Saukett
Poliovirus	3.5	10	0.0106522	5760	938.774	7	37				type3, Saukett
Poliovirus	0.34	2	0.0734327	5	8.36967	8	5				type1. LSc
Poliovirus	0.58	2	0.0734327	10	14.1673	8	5				type1. LSc
Poliovirus	0.88	2	0.0734327	30	24.227	8	5				type1. LSc
Poliovirus	0.71	2	0.0734327	90	27.1991	8	5				type1. LSc
Poliovirus	1.23	2	0.0734327	180	27.2358	8	5				type1. LSc
Coxsackievirus	0.44	1	0.0734327	122	13.6162	7	5			purified	B5
Coxsackievirus	1.46	1	0.0734327	360	13.6179	7	5			purified	B5
Coxsackievirus	2.74	1	0.0734327	600	13.6179	7	5			purified	B5
Coxsackievirus	4.77	1	0.0734327	940	13.6179	7	5			purified	B5
Coxsackievirus	0.19	1	0.0734327	120	13.6159	8	5			purified	B5
Coxsackievirus	0.93	1	0.0734327	360	13.6179	8	5			purified	B5
Coxsackievirus	1.71	1	0.0734327	600	13.6179	8	5			purified	B5
Coxsackievirus	3.25	1	0.0734327	900	13.6179	8	5			purified	B5
Coxsackievirus	5.08	1	0.0734327	1300	13.6179	8	5			purified	B5
Coxsackievirus	1.52	1	0.0734327	180	13.6179	7	5			purified	B3
Coxsackievirus	2.39	1	0.0734327	300	13.6179	7	5			purified	B3
Coxsackievirus	2.9	1	0.0734327	360	13.6179	7	5			purified	B3
Coxsackievirus	3.65	1	0.0734327	420	13.6179	7	5			purified	B3
Coxsackievirus	0.6	1	0.0734327	120	13.6159	8	5			purified	B3
Coxsackievirus	2.28	1	0.0734327	280	13.6179	8	5			purified	B3
Coxsackievirus	4.4	1	0.0734327	480	13.6179	8	5			purified	B3
Coxsackievirus	0.01	10	0.0106522	1	9.94693	8	5			purified	B5
Coxsackievirus	0.01	10	0.0106522	3	29.5257	8	5			purified	B5
Coxsackievirus	0.21	10	0.0106522	10	94.8581	8	5			purified	B5
Coxsackievirus	0.98	10	0.0106522	30	256.788	8	5			purified	B5
Coxsackievirus	2.29	10	0.0106522	60	443.335	8	5			purified	B5
Coxsackievirus	0.9	1	0.0734327	180	13.6179	7	5	92	0.55	environ	B5
Coxsackievirus	1.51	1	0.0734327	360	13.6179	7	5	92	0.55	environ	B5
Coxsackievirus	2.89	1	0.0734327	660	13.6179	7	5	92	0.55	environ	B5
Coxsackievirus	4.99	1	0.0734327	1300	13.6179	7	5	92	0.55	environ	B5
Coxsackievirus	1.07	1	0.0734327	180	13.6179	7	5	92	0.55	environ	B5
Coxsackievirus	1.62	1	0.0734327	360	13.6179	7	5	92	0.55	environ	B5
Coxsackievirus	3	1	0.0734327	660	13.6179	7	5	92	0.55	environ	B5
Coxsackievirus	5.09	1	0.0734327	1300	13.6179	7	5	92	0.55	environ	B5
Coxsackievirus	0.12	1	0.0734327	120	13.6159	7	5	370	0.17	environ	B5
Coxsackievirus	0.27	1	0.0734327	240	13.6179	7	5	370	0.17	environ	B5
Coxsackievirus	0.98	1	0.0734327	360	13.6179	7	5	370	0.17	environ	B5
Coxsackievirus	2.26	1	0.0734327	730	13.6179	7	5	370	0.17	environ	B5
Coxsackievirus	4.37	1	0.0734327	1300	13.6179	7	5	370	0.17	environ	B5
Coxsackievirus	0.25	1	0.0734327	120	13.6159	7	5	370	0.17	environ	B5
Coxsackievirus	0.58	1	0.0734327	240	13.6179	7	5	370	0.17	environ	B5
Coxsackievirus	1.2	1	0.0734327	360	13.6179	7	5	370	0.17	environ	B5
Coxsackievirus	2.4	1	0.0734327	730	13.6179	7	5	370	0.17	environ	B5
Coxsackievirus	4.54	1	0.0734327	1300	13.6179	7	5	370	0.17	environ	B5
Coxsackievirus	0.37	1	0.0734327	14	8.74677	7	5	500	0.6	environ	B5
Coxsackievirus	0.76	1	0.0734327	55	13.378	7	5	500	0.6	environ	B5
Coxsackievirus	1.35	1	0.0734327	180	13.6179	7	5	500	0.6	environ	B5
Coxsackievirus	2.15	1	0.0734327	300	13.6179	7	5	500	0.6	environ	B5
Coxsackievirus	2.66	1	0.0734327	420	13.6179	7	5	500	0.6	environ	B5
Coxsackievirus	3.55	1	0.0734327	540	13.6179	7	5	500	0.6	environ	B5
Coxsackievirus	0.37	1	0.0734327	14	8.74677	7	5	500	0.6	environ	B5
Coxsackievirus	0.91	1	0.0734327	55	13.378	7	5	500	0.6	environ	B5
Coxsackievirus	1.56	1	0.0734327	180	13.6179	7	5	500	0.6	environ	B5
Coxsackievirus	2.32	1	0.0734327	300	13.6179	7	5	500	0.6	environ	B5
Coxsackievirus	2.81	1	0.0734327	420	13.6179	7	5	500	0.6	environ	B5
Coxsackievirus	3.72	1	0.0734327	540	13.6179	7	5	500	0.6	environ	B5
Coxsackievirus	0.39	1	0.0734327	120	13.6159	7	5	0	0	environ	B5
Coxsackievirus	1.42	1	0.0734327	360	13.6179	7	5	0	0	environ	B5
Coxsackievirus	2.68	1	0.0734327	600	13.6179	7	5	0	0	environ	B5
Coxsackievirus	4.48	1	0.0734327	950	13.6179	7	5	0	0	environ	B5
Coxsackievirus	0.49	1	0.0734327	120	13.6159	7	5	0	0	environ	B5
Coxsackievirus	1.6	1	0.0734327	360	13.6179	7	5	0	0	environ	B5
Coxsackievirus	2.82	1	0.0734327	600	13.6179	7	5	0	0	environ	B5
Coxsackievirus	4.97	1	0.0734327	950	13.6179	7	5	0	0	environ	B5
Echovirus	1.76	1	0.0734327	6	4.85271	7	5			purified	type1
Echovirus	3.12	1	0.0734327	15	9.09165	7	5			purified	type1
Echovirus	3.55	1	0.0734327	24	11.2806	7	5			purified	type1
Echovirus	3.72	1	0.0734327	30	12.1135	7	5			purified	type1
Echovirus	3.96	1	0.0734327	36	12.6496	7	5			purified	type1
Echovirus	1.4	1	0.0734327	3.5	3.0864	8	5			purified	type1
Echovirus	2.84	1	0.0734327	15	9.09165	8	5			purified	type1
Echovirus	3.33	1	0.0734327	24	11.2806	8	5			purified	type1
Echovirus	3.53	1	0.0734327	30	12.1135	8	5			purified	type1
Echovirus	0.26	1	0.0734327	120	13.6159	7	5			purified	type11
Echovirus	0.49	1	0.0734327	240	13.6179	7	5			purified	type11
Echovirus	0.78	1	0.0734327	420	13.6179	7	5			purified	type11
Echovirus	3.51	1	0.0734327	1350	13.6179	7	5			purified	type11
Echovirus	1.02	1	0.0734327	360	13.6179	8	5			purified	type11
Echovirus	1.71	1	0.0734327	720	13.6179	8	5			purified	type11
Echovirus	3.86	1	0.0734327	1350	13.6179	8	5			purified	type11
Echovirus	0.03	1	0.0734327	120	13.6159	7	5	92	0.55	environ	type11
Echovirus	0.3	1	0.0734327	420	13.6179	7	5	92	0.55	environ	type11
Echovirus	1.03	1	0.0734327	720	13.6179	7	5	92	0.55	environ	type11
Echovirus	2.2	1	0.0734327	1200	13.6179	7	5	92	0.55	environ	type11
Echovirus	0.26	1	0.0734327	120	13.6159	7	5	92	0.55	environ	type11
Echovirus	0.45	1	0.0734327	420	13.6179	7	5	92	0.55	environ	type11
Echovirus	1.31	1	0.0734327	720	13.6179	7	5	92	0.55	environ	type11
Echovirus	2.54	1	0.0734327	1200	13.6179	7	5	92	0.55	environ	type11
Echovirus	0.47	1	0.0734327	60	13.4517	7	5	370	0.17	environ	type11
Echovirus	0.7	1	0.0734327	120	13.6159	7	5	370	0.17	environ	type11
Echovirus	1.07	1	0.0734327	180	13.6179	7	5	370	0.17	environ	type11
Echovirus	1.41	1	0.0734327	240	13.6179	7	5	370	0.17	environ	type11
Echovirus	1.53	1	0.0734327	280	13.6179	7	5	370	0.17	environ	type11
Echovirus	1.59	1	0.0734327	300	13.6179	7	5	370	0.17	environ	type11
Echovirus	1.95	1	0.0734327	340	13.6179	7	5	370	0.17	environ	type11
Echovirus	0.58	1	0.0734327	60	13.4517	7	5	370	0.17	environ	type11
Echovirus	0.83	1	0.0734327	120	13.6159	7	5	370	0.17	environ	type11
Echovirus	1.19	1	0.0734327	180	13.6179	7	5	370	0.17	environ	type11
Echovirus	1.51	1	0.0734327	240	13.6179	7	5	370	0.17	environ	type11
Echovirus	1.74	1	0.0734327	280	13.6179	7	5	370	0.17	environ	type11
Echovirus	1.65	1	0.0734327	300	13.6179	7	5	370	0.17	environ	type11
Echovirus	2.11	1	0.0734327	340	13.6179	7	5	370	0.17	environ	type11
Echovirus	0.39	1	0.0734327	360	13.6179	7	5	500	0.6	environ	type11
Echovirus	0.95	1	0.0734327	700	13.6179	7	5	500	0.6	environ	type11
Echovirus	2.28	1	0.0734327	1300	13.6179	7	5	500	0.6	environ	type11
Echovirus	0.63	1	0.0734327	360	13.6179	7	5	500	0.6	environ	type11
Echovirus	1.07	1	0.0734327	700	13.6179	7	5	500	0.6	environ	type11
Echovirus	2.28	1	0.0734327	1300	13.6179	7	5	500	0.6	environ	type11
Echovirus	0.34	1	0.0734327	240	13.6179	7	5	0	0	environ	type11
Echovirus	0.6	1	0.0734327	360	13.6179	7	5	0	0	environ	type11
Echovirus	0.79	1	0.0734327	420	13.6179	7	5	0	0	environ	type11
Echovirus	3.3	1	0.0734327	1300	13.6179	7	5	0	0	environ	type11
Echovirus	0.45	1	0.0734327	240	13.6179	7	5	0	0	environ	type11
Echovirus	0.65	1	0.0734327	360	13.6179	7	5	0	0	environ	type11
Echovirus	0.81	1	0.0734327	420	13.6179	7	5	0	0	environ	type11
Echovirus	3.65	1	0.0734327	1300	13.6179	7	5	0	0	environ	type11
